# Supplementary material
Source: Springer Nature journal article supplement (https://www.springermedizin.de/resource/supplementary/13685_2014_31_MOESM15_ESM.pdf/9681246)

†p < 0.05, ††p < 0.01, †††p < 0.001, ††††p < 0.0001

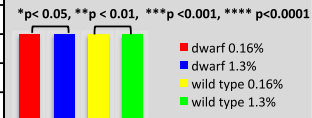

# Transsulfuration Pathway

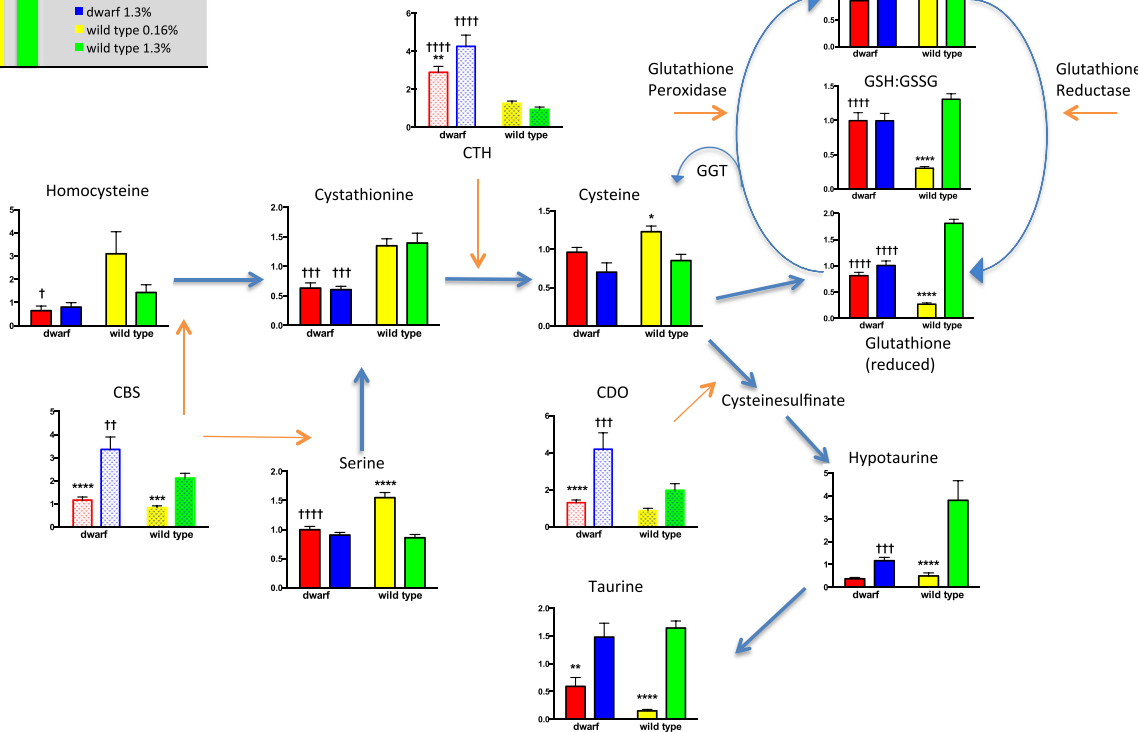

Supplement: MOESM15 [file 9681246]
